# Supplementary material for: Implementing cancer prevention in occupational healthcare: initial insights from occupational healthcare staff in Central and Southern Europe – findings from the CPW project
Source: Springer Nature journal article supplement (doi:10.1186/s12885-026-15607-0), 2026-01-22
Supplement: MOESM1 [file 12885_2026_15607_MOESM1_ESM.pdf › 12885_2026_15607_MOESM1_ESM.pdf]

## Supplementary material

### Supplementary Material 1: Domains of the Second Section of the Questionnaire

#### Assessment of the Prevention Programs

|                                                                                                                    |
|--------------------------------------------------------------------------------------------------------------------|
| 1. The proposed new Screening or Health Education Programs come from a reliable source.                            |
| 2. There are many advantages of the new Screening or Health Education Programs with regard to health improvements. |
| 3. The research evidence for the new Screening or Health Education Programs is sufficiently strong.                |
| 4. The provision of the new Screening or Health Education Programs is sufficiently flexible in practice.           |
| 5. The provision of the new Screening or Health Education Programs is complex in practice.                         |
| 6. I see potential harms of the new Screening or Health Education Programs.                                        |

#### Contextual Factors Influencing the Prevention Programs

|                                                                                                                                                   |
|---------------------------------------------------------------------------------------------------------------------------------------------------|
| 1. I have sufficient time in my daily practice to implement the new Screening or Health Education Programs.                                       |
| 2. My place to work is ready for implementing the new Screening or Health Education Programs (e.g. sufficient facilities for testing).            |
| 3. Information on the new Screening or Health Education Programs for workers is well-organised.                                                   |
| 4. The head of the occupational healthcare team supports the new Screening or Health Education Programs.                                          |
| 5. The employer(s) support the new Screening or Health Education Programs.                                                                        |
| 6. Follow-up after Screening or Health Education Programs of workers (if required) is well-organised.                                             |
| 7. The new Screening or Health Education Programs have sufficient priority in my place to work.                                                   |
| 8. In previous years, my place to work has generally implemented new Screening or Health Education Programs fast.                                 |
| 9. Local opinion leaders support the new Screening or Health Education Programs.                                                                  |
| 10. The organization provides additional support for implementation of the new Screening or Health Education Programs (e.g. resident physicians). |

### **Role of OHCP During Implementation of the Prevention Programs**

|                                                                                                                             |
|-----------------------------------------------------------------------------------------------------------------------------|
| 1. My professional attitudes match with the basic principles of the new Screening or Health Education Programs.             |
| 2. From the beginning of the project I feel involved in the implementation of the new screening procedures.                 |
| 3. I feel sufficiently competent to implement the new Screening or Health Education Programs.                               |
| 4. I can exclude individual workers from the new Screening or Health Education Programs for medical reasons.                |
| 5. I perceive resistance from the workers against the new Screening or Health Education Programs.                           |
| 6. Colleagues in my team convinced me to implement the new Screening or Health Education Programs.                          |
| 7. I am able to change my operational procedures in daily work to implement the new Screening or Health Education Programs. |
| 8. I feel overstrained with the changes in relation to the new Screening or Health Education Programs.                      |
| 9. The new Screening or Health Education Programs change my area of work/tasks substantially.                               |
