# Supplementary material for: Implementing cancer prevention in occupational healthcare: initial insights from occupational healthcare staff in Central and Southern Europe – findings from the CPW project
Source: Springer Nature journal article supplement (doi:10.1186/s12885-026-15607-0), 2026-01-22
Supplement: MOESM2 [file 12885_2026_15607_MOESM2_ESM.pdf › 12885_2026_15607_MOESM2_ESM.pdf]

## Supplementary material

### Supplementary Material 2: Results of the Reliability Analysis

|                                                                   | N  | Number of items | Answering categories | Scale construction | Cronbach's alpha | Omega |
|-------------------------------------------------------------------|----|-----------------|----------------------|--------------------|------------------|-------|
| <b>Assessment of the Prevention Programs</b>                      |    |                 |                      |                    |                  |       |
| HCV Screening                                                     | 37 | 6               | 5                    | Average            | 0.41             | 0.88  |
| HP Screening                                                      | 36 | 6               | 5                    | Average            | 0.53             | 0.83  |
| HPV Counselling                                                   | 22 | 6               | 5                    | Average            | 0.27             | 0.84  |
| <b>Contextual Factors Influencing the Prevention Programs</b>     |    |                 |                      |                    |                  |       |
| HCV Screening                                                     | 18 | 10              | 5                    | Average            | 0.92             | 0.95  |
| HP Screening                                                      | 16 | 10              | 5                    | Average            | 0.75             | 0.88  |
| HPV Counselling                                                   | 13 | 10              | 5                    | Average            | 0.84             | 0.90  |
| <b>OHCP Role During Implementation of the Prevention Programs</b> |    |                 |                      |                    |                  |       |
| HCV Screening                                                     | 24 | 9               | 5                    | Average            | 0.57             | 0.76  |
| HP Screening                                                      | 35 | 9               | 5                    | Average            | 0.61             | 0.76  |
| HPV Counselling                                                   | 15 | 9               | 5                    | Average            | 0.57             | 0.84  |
